# Supplementary material
Source: PubMed Central journal article supplement (PMC4575256)
Supplement: NIHMS680632-supplement-Supp_Material.pdf [file NIHMS680632-supplement-Supp_Material.pdf]

Web-based Supplementary Materials for Bayesian  
Nonlinear Model Selection for Gene Regulatory  
Networks by Yang Ni, Francesco C. Stingo and  
Veerabhadran Baladandayuthapani

December 11, 2014

## Web Appendix A: Inverted Pareto Distribution

Here we discuss the inverted Pareto distribution as it has been defined as the prior distribution for the smoothing parameter  $\tau$ . Compared to the standard Gamma prior, the inverted Pareto distribution achieves a degree of flexibility in skewness. The inverted Pareto distribution  $Ip(a, b)$  has pdf,

$$\pi(\tau|a, b) = \frac{a}{b} \left(\frac{\tau}{b}\right)^{a-1}, \text{ for } a > 0, 0 < \tau < b.$$

The skewness of inverted Pareto distribution can be adjusted through parameter  $a$ : it is uniform distribution on  $(0, b)$  when  $a = 1$ , puts its mass on small values when  $a < 1$  and puts its mass on large values when  $a > 1$ . See Web Figure 1 for the density with several different values of  $a$ .

## Web Appendix B: Specification of Mixture Prior

We elicit the prior by intersecting the Gamma distribution and the inverted Pareto distribution at a pre-specified cut-point. This cut-point provides the best separation of the non-linear and linear components defined by small and large values of  $\tau$  respectively; and was chosen through simulation studies on a variety of test functions. In order to allow for uncertainty of this choice, we allow for overlapping between the two distributions such that the MCMC sampler has the ability to sample (with positive probability) from one distribution or the other.

Two datasets were generated for this purpose: one is completely linear and the other is completely non-linear. Then we fit our nDAG model to both datasets and plot the kernel density estimation of the MCMC samples of smoothing parameter  $\tau$  in Web Figure 2 from which we observe the cut-point is around 30.

For the parameter  $b$  of the inverted Pareto distribution which controls the range of  $\tau$ , we choose it to be large enough so that the fitted curve is practically linear for any  $\tau$  greater than  $b$  (Morrissey et al., 2011).

The resulting mixture prior is presented in Web Figure 3.

## Web Appendix C: Posterior Inference

Our major interest is in the network parameters,  $\gamma_{gj}$ , and the smoothing parameters,  $\tau_{gj}$ , that are in the posterior distribution,  $\pi(\tau_{\mathbf{g}}, \gamma_{\mathbf{g}} | \mathbf{y}_{\mathbf{g}})$ . We therefore integrate out the spline coefficient,  $\beta_{gj}$ , the constant term,  $\mu_g$  and the error precision,  $\lambda_g$ , from the full likelihood to obtain the marginal log-likelihood:

$$p(\mathbf{y}_{\mathbf{g}} | \tau_{\mathbf{g}}, \gamma_{\mathbf{g}}) \propto |\mathbf{P}_{\gamma_{\mathbf{g}}}|^{1/2} |\mathbf{A}_{\mathbf{g}}|^{-1/2} (\mathbf{1}_{\mathbf{n}}' \mathbf{B}_{\mathbf{g}} \mathbf{1}_{\mathbf{n}} + \kappa_{\mu})^{-1/2} (a_g + b_{\lambda})^{-(a_{\lambda} + n/2)},$$

where  $\mathbf{1}_n$  is a column vector of ones,  $\gamma_{\mathbf{g}} = (\gamma_{g1}, \dots, \gamma_{gG})'$ ,  $\mathbf{A}_{\mathbf{g}} = \mathbf{X}_{\gamma_{\mathbf{g}}} \mathbf{X}_{\gamma_{\mathbf{g}}} + \mathbf{P}_{\gamma_{\mathbf{g}}}$ ,  $\mathbf{B}_{\mathbf{g}} = \mathbf{I}_n - \mathbf{X}_{\gamma_{\mathbf{g}}} \mathbf{A}_{\mathbf{g}}^{-1} \mathbf{X}_{\gamma_{\mathbf{g}}}'$ ,  $\mathbf{I}_n$  is the identity matrix,  $a_g = \frac{1}{2} \left\{ \mathbf{y}_{\mathbf{g}}' \mathbf{B}_{\mathbf{g}} \mathbf{y}_{\mathbf{g}} - \frac{(\mathbf{y}_{\mathbf{g}}' \mathbf{B}_{\mathbf{g}} \mathbf{1}_n)^2}{\mathbf{1}_n' \mathbf{B}_{\mathbf{g}} \mathbf{1}_n + \kappa_{\mu}} \right\}$ , the block diagonal matrix  $\mathbf{P}_{\mathbf{g}} = \text{diag}(\tau_{g1} \mathbf{K}, \tau_{g2} \mathbf{K}, \dots, \tau_{gG} \mathbf{K})$ ,  $\mathbf{X}_{\gamma_{\mathbf{g}}}$  is the submatrix of  $\mathbf{X}$  corresponding to the columns  $j$ , for which  $\gamma_{gj} = 1$ , and  $\mathbf{P}_{\gamma_{\mathbf{g}}}$  is the submatrix of  $\mathbf{P}_{\mathbf{g}}$  with the  $j$ th block, for which  $\gamma_{gj} = 1$ . The ordering of the nodes in the graph implies  $\gamma_{gj} = 0$  for all  $j \geq g$ . Then the posterior distribution  $\pi(\tau_{\mathbf{g}}, \gamma_{\mathbf{g}} | \mathbf{y}_{\mathbf{g}})$  is expressed as

$$\pi(\tau_{\mathbf{g}}, \gamma_{\mathbf{g}} | \mathbf{y}_{\mathbf{g}}) \propto p(\mathbf{y}_{\mathbf{g}} | \tau_{\mathbf{g}}, \gamma_{\mathbf{g}}) \prod_{j=1}^{g-1} \pi(\gamma_{gj} | \rho) \pi(\tau_{gj} | \phi_{gj}, \gamma_{gj}) \pi(\phi_{gj} | \omega, \gamma_{gj}).$$

Below we briefly describe the MCMC algorithm implemented to sample from the posterior distribution  $\pi(\tau_{\mathbf{g}}, \gamma_{\mathbf{g}} | \mathbf{y}_{\mathbf{g}})$ .

## SAMPLING SCHEME

Since the posterior distribution  $\pi(\tau_{\mathbf{g}}, \gamma_{\mathbf{g}} | \mathbf{y}_{\mathbf{g}})$  is analytically intractable, we construct an MCMC sampler to obtain a posterior sample of the parameters  $\tau_{gj}$  and  $\gamma_{gj}$ . Moreover, since the parameter space of the binary variables  $\gamma_{gj}$  is enormous, it is impractical to compute the explicit posterior probabilities for all possible subsets. Instead, we use stochastic search variable selection (SSVS) and Gibbs sampling (George and McCulloch, 1993) to explore the posterior distribution of the models.

The MCMC consists of two parts: (I) A Metropolis-Hastings (M-H) step for network parameter  $\gamma_{\mathbf{g}} = \{\gamma_{gj}\}_{j=1}^G$ , smoothing parameter  $\tau_{\mathbf{g}} = \{\tau_{gj}\}_{j=1}^G$  and mixture indicator  $\phi_{\mathbf{g}} = \{\phi_{gj}\}_{j=1}^G$  and (II) a Gibbs sampler for parameters  $\rho$  and  $\omega$ . To obtain a good mixing of the chain, we accomplish the M-H step in three intermediate steps: (A) sampling  $\gamma_{\mathbf{g}}$ ,  $\tau_{\mathbf{g}}$  and  $\phi_{\mathbf{g}}$ ; (B) sampling  $\tau_{\mathbf{g}}$  and  $\phi_{\mathbf{g}}$ ; and (C) sampling  $\tau_{\mathbf{g}}$ .

For  $g = 1, \dots, G$ , at each iteration:

(A) Update  $\tau$ ,  $\gamma$  and  $\phi$  jointly (between-model move). This involves sampling the indicator variable  $\gamma$ . For that, we randomly choose  $j$  from set  $[g-] = \{1, \dots, g-1\}$  and change

the value of  $\gamma_{gj}$  to  $\gamma_{gj}^*$ , either from 0 to 1 or 1 to 0. If  $\gamma_{gj}^* = 1$ , then we propose  $\tau_{gj}^*$  and  $\phi_{gj}^*$  from the log-normal and Bernoulli distributions, respectively. We accept  $(\gamma_{gj}^*, \tau_{gj}^*, \phi_{gj}^*)$  according to the M-H acceptance ratio,

$$\alpha_{\gamma, \tau} = \frac{p(\mathbf{y}_{\mathbf{g}} | \tau_{\mathbf{g}}^*, \gamma_{\mathbf{g}}^*) \pi(\gamma_{gj}^* | \rho) \pi(\tau_{gj}^* | \phi_{gj}^*, \gamma_{gj}^*) \pi(\phi_{gj}^* | \omega, \gamma_{gj}^*) q(\tau_{gj} | \gamma_{gj}) q(\phi_{gj} | \gamma_{gj}) q(\gamma_{gj} | \gamma_{gj}^*)}{p(\mathbf{y}_{\mathbf{g}} | \tau_{\mathbf{g}}, \gamma_{\mathbf{g}}) \pi(\gamma_{gj} | \rho) \pi(\tau_{gj} | \phi_{gj}, \gamma_{gj}) \pi(\phi_{gj} | \omega, \gamma_{gj}) q(\tau_{gj}^* | \gamma_{gj}^*) q(\phi_{gj}^* | \gamma_{gj}^*) q(\gamma_{gj}^* | \gamma_{gj})},$$

where  $q(\cdot | \cdot)$  is a generic notation for the proposed densities.

(B) Update  $\tau$  and  $\phi$ . Here we want  $\tau$  to be updated more often as it is continuous and therefore has a much bigger parameter space than that of a discrete parameter. So in the next two steps, we perform within-model moves for the parameter  $\tau$ . The first step is to update  $\tau$  and  $\phi$  together, since  $\tau$  has a mixture prior that depends on the parameter  $\phi$ . Similarly to what we have done for  $\gamma$ , we randomly choose  $j$  from  $\{j : \gamma_{gj} \neq 0\}$  and switch  $\phi_{gj}$  to  $\phi_{gj}^*$ , either from 0 to 1 or 1 to 0. For the parameter  $\tau_{gj}$ , we propose its candidate  $\tau_{gj}^*$  from the log-normal distribution with the mean equal to  $\tau_{gj}$ . We accept  $(\tau_{gj}^*, \phi_{gj}^*)$  according to the ratio

$$\alpha_{\tau} = \frac{p(\mathbf{y}_{\mathbf{g}} | \tau_{\mathbf{g}}^*, \gamma_{\mathbf{g}}) \pi(\tau_{gj}^* | \phi_{gj}^*, \gamma_{gj}) \pi(\phi_{gj}^* | \omega, \gamma_{gj}) q(\tau_{gj} | \tau_{gj}^*, \gamma_{gj}) q(\phi_{gj} | \phi_{gj}^*, \gamma_{gj})}{p(\mathbf{y}_{\mathbf{g}} | \tau_{\mathbf{g}}, \gamma_{\mathbf{g}}) \pi(\tau_{gj} | \phi_{gj}, \gamma_{gj}) \pi(\phi_{gj} | \omega, \gamma_{gj}) q(\tau_{gj}^* | \tau_{gj}, \gamma_{gj}) q(\phi_{gj}^* | \phi_{gj}, \gamma_{gj})}.$$

(C) Update  $\tau$ . Here we update  $\tau$  alone, using the random walk Metropolis-within-Gibbs algorithm. We propose  $\tau_{gj}^*$  from the log-normal distribution with mean  $\tau_{gj}$  and accept it with

$$\alpha_{\tau} = \frac{p(\mathbf{y}_{\mathbf{g}} | \tau_{\mathbf{g}}^*, \gamma_{\mathbf{g}}) \pi(\tau_{gj}^* | \phi_{gj}, \gamma_{gj}) q(\tau_{gj} | \tau_{gj}^*, \gamma_{gj})}{p(\mathbf{y}_{\mathbf{g}} | \tau_{\mathbf{g}}, \gamma_{\mathbf{g}}) \pi(\tau_{gj} | \phi_{gj}, \gamma_{gj}) q(\tau_{gj}^* | \tau_{gj}, \gamma_{gj})},$$

for each  $j \in \{j : \gamma_{gj} \neq 0\}$  sequentially.

(D) Update  $\rho$ . We implement a simple Gibbs step to draw  $\rho^*$  from  $Beta(\sum_{j < g} \gamma_{gj} + a_{\rho}, \sum_{j < g} (1 - \gamma_{gj}) + b_{\rho})$ .

(E) Update  $\omega$ . Likewise, we apply a simple Gibbs step to draw  $\omega^*$  from  $Beta(\sum_{j < g} I(\phi_{gj} = 1) + a_{\omega}, \sum_{j < g} I(\phi_{gj} = 0) + b_{\omega})$ .

Upon completion, the sampling scheme results in a list of visited models based on the indicator variables. A simple approach for model selection is to select edges whose posterior inclusion probability (i.e., the marginal posterior probability of  $\gamma_{gj} = 1$ ) is higher than a pre-specified threshold. A popular threshold is 0.5, which results in the so-called *median probability model* (Barbieri and Berger, 2004). Marginal posterior probabilities can be approximated by the fraction of time each  $\gamma_{gj}$  is visited by the Markov chain.

An alternative approach, which we use in this paper, is to pick the model with the highest (joint) posterior probability based on the MCMC samples. This approach is not commonly used since, in several applications, a stochastic search results in several models with very similar posterior probabilities. By contrast, in our applications we have observed that the highest probability model is clearly identified, i.e., its posterior probability is much higher than that of the second model in the ranking. We speculate that this desirable feature is due to the greater flexibility of our approach. The two approaches would coincide in many cases, for example, when there is a model with a posterior probability considerably higher than those of the other models (a model with a posterior probability higher than 0.5 is a special case). In our case, we observe a very good agreement between these two approaches.

## ESTIMATION AND PREDICTION

Given  $\tau_{\mathbf{g}}$  and  $\gamma_{\mathbf{g}}$ , we derive the conditional posterior distribution of the parameters not sampled in the MCMC algorithm, namely the spline coefficients  $\beta_{gj}$ , the intercept  $\mu_g$ , and the precision  $\lambda_g$ . The precision parameter has the following posterior distribution,

$$\lambda_g | \mathbf{y}_{\mathbf{g}}, \tau_{\mathbf{g}}, \gamma_{\mathbf{g}} \sim \text{Gamma}(a_{\lambda} + \frac{n}{2}, b_{\lambda} + b_g),$$

where

$$b_g = \frac{1}{2} \mathbf{y}'_{\mathbf{g}} \mathbf{D} \mathbf{y}_{\mathbf{g}} + \frac{1}{4} \mathbf{y}'_{\mathbf{g}} \mathbf{D} \mathbf{X}_{\gamma_{\mathbf{g}}} \left( -\frac{1}{2} \mathbf{X}'_{\gamma_{\mathbf{g}}} \mathbf{D} \mathbf{X}_{\gamma_{\mathbf{g}}} - \frac{1}{2} \mathbf{P}_{\gamma_{\mathbf{g}}} \right)^{-1} \mathbf{X}'_{\gamma_{\mathbf{g}}} \mathbf{D} \mathbf{y}_{\mathbf{g}}, \quad \mathbf{D} = \mathbf{I}_{\mathbf{n}} - \frac{\mathbf{1}_{\mathbf{n}} \mathbf{1}'_{\mathbf{n}}}{n + \kappa_{\mu}}.$$

The constant term and spline coefficients are multivariate normal:

$$\alpha_{\mathbf{g}} | \mathbf{y}_{\mathbf{g}}, \lambda_{\mathbf{g}}, \tau_{\mathbf{g}}, \gamma_{\mathbf{g}} \sim N(\mu_{\alpha_{\mathbf{g}}}, \mathbf{T}_{\alpha_{\mathbf{g}}}^{-1}),$$

where

$$\alpha_{\mathbf{g}} = \begin{pmatrix} \mu_{\mathbf{g}} \\ \beta_{\mathbf{g}} \end{pmatrix}, \quad \mathbf{Z}_{\gamma_{\mathbf{g}}} = \begin{pmatrix} \mathbf{1}_n & \mathbf{X}_{\gamma_{\mathbf{g}}} \end{pmatrix}, \quad \mathbf{C}_{\mathbf{g}} = \begin{pmatrix} \kappa_{\mu} & 0 \\ 0 & \mathbf{P}_{\gamma_{\mathbf{g}}} \end{pmatrix},$$

$$\mu_{\alpha_{\mathbf{g}}} = (\mathbf{Z}'_{\gamma_{\mathbf{g}}} \mathbf{Z}_{\gamma_{\mathbf{g}}} + \mathbf{C}_{\mathbf{g}})^{-1} \mathbf{Z}'_{\gamma_{\mathbf{g}}} \mathbf{y}_{\mathbf{g}}, \quad \mathbf{T}_{\alpha_{\mathbf{g}}} = \lambda_{\mathbf{g}} (\mathbf{Z}'_{\gamma_{\mathbf{g}}} \mathbf{Z}_{\gamma_{\mathbf{g}}} + \mathbf{C}_{\mathbf{g}}).$$

Posterior inference on  $\alpha_{\mathbf{g}}$ , e.g. estimation of  $\alpha_{\mathbf{g}}$  under a squared error loss, can be performed through Monte Carlo integration. The posterior expected value of  $\alpha_{\mathbf{g}}$  is

$$E[\alpha_{\mathbf{g}} | \mathbf{y}_{\mathbf{g}}] \approx \frac{1}{N} \sum_{i=1}^N \mu_{\alpha_{\mathbf{g}}}(\tau_{\mathbf{g}}^{(i)}, \gamma_{\mathbf{g}}^{(i)}),$$

where  $\tau_{\mathbf{g}}^{(i)}, \gamma_{\mathbf{g}}^{(i)}$  are  $N$  posterior samples drawn from the MCMC procedure.

Suppose we observe a new set of data  $\mathbf{y}_1^*, \dots, \mathbf{y}_{\mathbf{g}-1}^*$  with sample size  $m$ . Let  $\mathbf{X}_{\mathbf{g}}^*$  be the spline design matrix of  $\mathbf{y}_1^*, \dots, \mathbf{y}_{\mathbf{g}-1}^*$  and  $\mathbf{X}_{\gamma_{\mathbf{g}}}^*$  be the same matrix given  $\gamma_{\mathbf{g}}$  and let  $\mathbf{Z}_{\gamma_{\mathbf{g}}}^* = (\mathbf{1}_m \ \mathbf{X}_{\gamma_{\mathbf{g}}}^*)$ . Then the predictive distribution of new observations  $\mathbf{y}_{\mathbf{g}}^*$  given  $\tau_{\mathbf{g}}, \gamma_{\mathbf{g}}$  is a multivariate student's t-distribution with mean

$$\mu_{\mathbf{g}}^* = \{ \mathbf{I}_m - \mathbf{Z}_{\gamma_{\mathbf{g}}}^* (\mathbf{Z}_{\gamma_{\mathbf{g}}}^{*'} \mathbf{Z}_{\gamma_{\mathbf{g}}}^* + \mathbf{Z}'_{\gamma_{\mathbf{g}}} \mathbf{Z}_{\gamma_{\mathbf{g}}} + \mathbf{C}_{\mathbf{g}})^{-1} \mathbf{Z}_{\gamma_{\mathbf{g}}}^{*'} \}^{-1} \mathbf{Z}_{\gamma_{\mathbf{g}}}^* (\mathbf{Z}_{\gamma_{\mathbf{g}}}^{*'} \mathbf{Z}_{\gamma_{\mathbf{g}}}^* + \mathbf{Z}'_{\gamma_{\mathbf{g}}} \mathbf{Z}_{\gamma_{\mathbf{g}}} + \mathbf{C}_{\mathbf{g}})^{-1} \mathbf{Z}'_{\gamma_{\mathbf{g}}} \mathbf{y}_{\mathbf{g}};$$

hence, by Bayesian model averaging over the high-probability model (Raftery et al., 1997; Hoeting et al., 1999), the mean of the predictive distribution can be approximated by

$$E[\mathbf{y}_{\mathbf{g}}^* | \mathbf{y}_{\mathbf{g}}, \mathbf{X}_{\mathbf{g}}^*] \approx \frac{1}{N} \sum_{i=1}^N \mu_{\mathbf{g}}^*(\tau_{\mathbf{g}}^{(i)}, \gamma_{\mathbf{g}}^{(i)}).$$

## Web Appendix D: Simulated Examples of Single Regression

In addition to the full network analysis in section 5, we conduct another simulation study for variable selection under single nonlinear regression setting. In this example, we generate 49 predictor variables independently from the standard uniform  $[0, 1]$  distribution. After standardizing each predictor, a response variable then has the following functional form:

$$\mathbf{y} = 2 + 3\mathbf{x}_1 - 4\mathbf{x}_2^2 - \exp(\mathbf{x}_3) + 4 \cos\left(\frac{4\pi\mathbf{x}_4}{7}\right) + 2 \sin\left(\frac{8\pi\mathbf{x}_5}{7}\right) + \epsilon, \quad (1)$$

where  $\epsilon \sim N_n(\mathbf{0}, \sigma^2 \mathbf{I}_n)$ . Hence, the true model contains only the first five variables.

The hyperparameters setting is the same as in section 5. We run an MCMC algorithm with 20,000 iterations, in which the first 2,000 iterations are considered as a “burn-in” period for both methods. We conduct 50 simulations for each method.

In the simulated true model, we have one linear function and four nonlinear functions: quadratic, exponential, cosine (with approximately one period within the data range), and sine (with approximately two periods within the data range) functions. We randomly choose one simulation and plot the reconstructions for the nMixDAG after adjusting for the mean. This plot appears in Web Figure 4, with the solid curves representing the true curves and the dashed curves the estimated curves. The 95% credible bands are also plotted as dotted lines. The performance of the reconstruction is quite reasonable, as the true curves and the estimated curves pretty much lie on top of each other and the true curves are contained in the credible bands. The quality of the reconstructions of the nDAG is almost identical to that of the nMixDAG (plot not shown).

We vary the sample sizes ( $n = 150, 200, 250$ ) and error variances ( $\sigma^2 = 4, 16$ ) to explore the performance of SSVS, nDAG, nMixDAG, spikeSlabGAM and SpAM under different signal-to-noise settings. We tabulate the results in Web Table 1 where the true positive

rate (TPR), the false discovery rate (FDR), the false negative rate (FNR=1-TPR) and mean squared prediction error (MSPE) are reported. The linear method SSVS is apparently not competitive with all the nonlinear approaches in terms of both prediction and variable selection and nMixDAG is always slightly better than nDAG. Although the difference is not substantial, spikeSlabGAM is the best in prediction. For instance, when  $n = 200, \sigma^2 = 16$ , the average MSPE of nMixDAG, spikeSlabGAM and SpAM are 21.161, 19.994 and 26.079, respectively. In terms of variable selection, generally, SpAM has the highest TPR yet at the price of unreasonable FDR (around 70%). On the other hand, although nMixDAG has lower TPR than spikeSlabGAM and SpAM, it has 0 FDR for all settings. For example, when  $n = 250, \sigma^2 = 16$ , nMixDAG has an average 0.804 TPR and 0 FDR while spikeSlabGAM has 0.980 TPR and 0.279 FDR, and SpAM has 1.000 TPR and 0.733 FDR. The trade-off between TPR and FDR shows that our method nMixDAG is more parsimonious than spikeSlabGAM and SpAM.

## Web Appendix E: GBM Data Analysis

In section 6, we analyzed the TCGA-based GBM gene expression data using our proposed model nMixDAG. TCGA provides microarray-based gene expression data for a large cohort of hundreds of GBM tumor specimens (241 in our case study) (TCGA, 2008). Newly-diagnosed glioblastomas are selected retrospectively from biospecimen repositories and further reviewed and processed through TCGA Biospecimen Core Resource to ensure less than 50% necrosis and more than 80% tumor nuclei for RNA extraction. Each qualified biospecimen is assayed using three platforms: Affymetrix U133A, Affymetrix Exon 1.0 ST and custom Agilent 244K, from which messenger RNA (mRNA) expression profiles are generated. Subsequently, the mRNA expression profiles are integrated into a single estimate of relative gene expression for each gene and for each sample. The heat map of marginal posterior inclusion probability for the edge between each pair of genes is shown in Web Figure 5 from which the sparsity of



our model is evident. Also, the marginal probabilities appear separated, i.e. either close to 0 or 1, which suggests the highest probability model in our application is clearly identifiable.

In addition, as kindly suggested by the anonymous associate editor, we include more genes in our real data analysis. We focus on the full RTK/PI3K signaling pathway<sup>1</sup> instead of the frequently mutated genes from the three core pathways, which consists of 195 genes. Despite the dimension being much higher and having run the same length of chains, we found strong evidence of convergence for all parameters: the PSRFs for  $\tau$  (95% of  $\tau$  values ranging from 1.000 to 1.0966),  $\rho$  (=1.000) and  $\omega$  (=1.000) are close to 1 and the correlations of posterior probabilities for  $\gamma$  and  $\phi$  are 0.911 and 0.971, respectively. Totally, we found 463 connections and 91 of them are nonlinear. While some connections are well studied: e.g. Ras activates PI3K family (Yan et al., 1998), some have not been fully understood, especially the nonlinear regulations listed In Web Tables 5, 6, 7. They are ordered by the degree of nonlinearity. We find 8 hub genes are: PTK2, ITGA3, KDR, SYK, PRLR, SOS2, PDPK1 and HSP90AB1. Two of them, KDR and PDPK1, were previously detected as driver genes for GBM in the literatures (TCGA, 2008; Cerami et al., 2010). The other 6 newly found hub genes might be potential GBM driver genes which need to be validated through biological experiment. We also apply the spikeSlabGAM to this dataset for comparison. The difference in WAIC between nMixDAG and spikeSlabGAM is substantial (103559 vs 211571), which again indicates nMixDAG has higher prediction power.

## Web Appendix F: Markov Equivalence Class

Our model is defined based on a prior ordering of the nodes. Without a prior ordering, we cannot distinguish two DAGs within the same Markov equivalence class (MEC) in which all DAGs have the same conditional independence assertions. If we ignore this aspect, we would define a computational inefficient approach that will never discriminate two Markov equivalent DAGs. More importantly, for (linear) Gaussian DAG, if the parameter priors are

---

<sup>1</sup><http://www.genome.jp/kegg/>

carefully chosen, the marginal likelihood is equivalent for Markov equivalent DAGs (Geiger and Heckerman, 2002). However, since our proposed DAG models are nonlinear, two Markov equivalent DAGs can represent different sets of distributions. In our work the ordering of the nodes is naturally obtained for the pathway information. Here we discuss the amount of prior information needed to discriminate two Markov equivalent DAGs when the prior ordering of the nodes is not available.

One possible way is to discriminate Markov equivalent graphs by adopting an informative prior based on the number of common edges between the proposed network and the reference network. However, it is not as straightforward as it appears. Consider the following example in Web Figure 6. Suppose the graph on the left panel is the reference network. The two graphs in middle and on the right are Markov equivalent and they have the same number of common edges with the reference graph. Hence the proposed prior would fail to distinguish between these two. In practice, the amount of prior biological information needed to discriminate two Markov equivalent DAGs is commensurate to the amount of the information needed to define an ordering of the model.

Another possible way to avoid repeatedly analyzing Markov equivalent DAGs is inspired by Andersson et al. (1997). They suggest to treat each MEC as a single model through *essential graph*, the union of all the graphs within the same MEC. There is a one-to-one relationship between MEC and its essential graph. Therefore, working with the MEC space could be a feasible and effective approach (Chickering, 2002). However, this approach does not help solve the issue of discriminating Markov equivalent DAGs either.

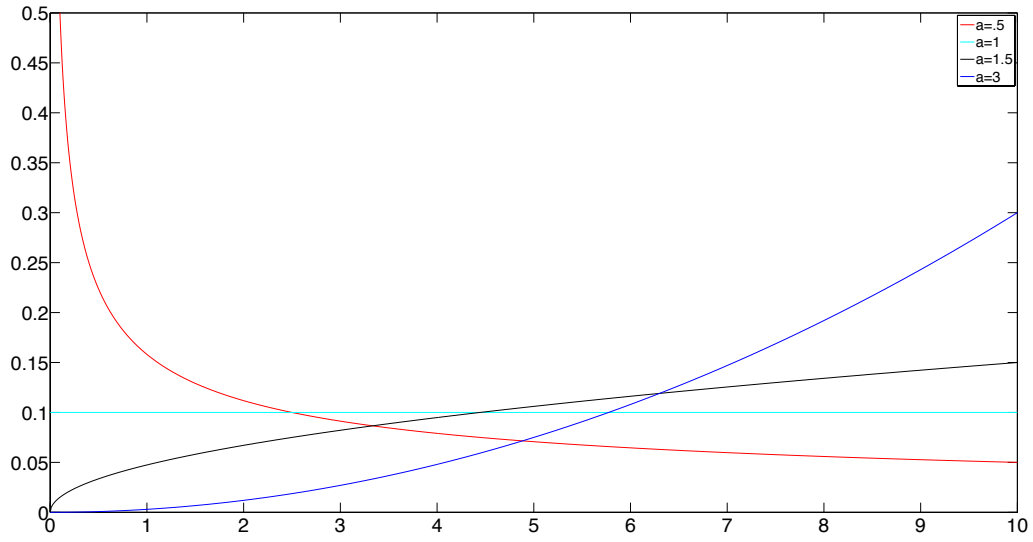

Web Figure 1: The inverted Pareto distribution with  $b = 10$  and  $a = 0.5$  (red), 1 (cyan), 1.5 (black), 3 (blue).

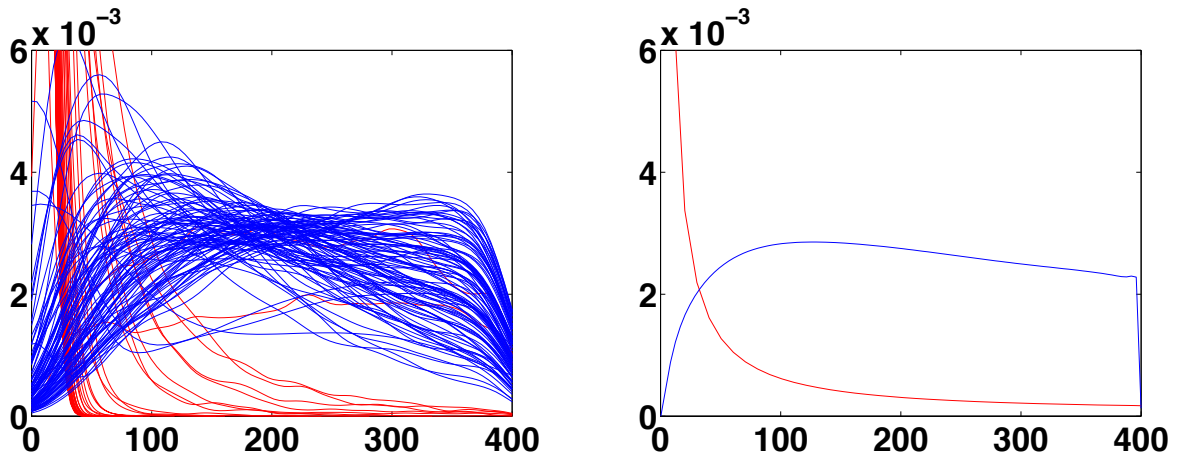

Web Figure 2: Specification of mixture prior. Kernel density estimation of the smoothing parameter  $\tau$ . The blue curves correspond to linear fit while the red curves correspond to non-linear fit.

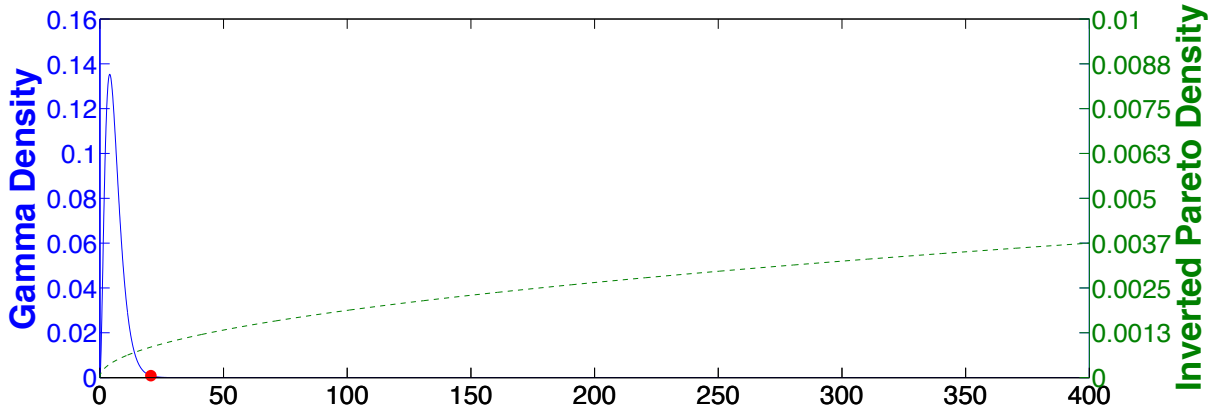

Web Figure 3: Gamma and Pareto distributions are plotted on different scales with their densities defined by the y-axis on the left and right sides, respectively. The solid curve is the Gamma density; the dashed curve is the inverted Pareto density. The red dot is the intersection of the two densities if they were plotted on the left y-axis scale.

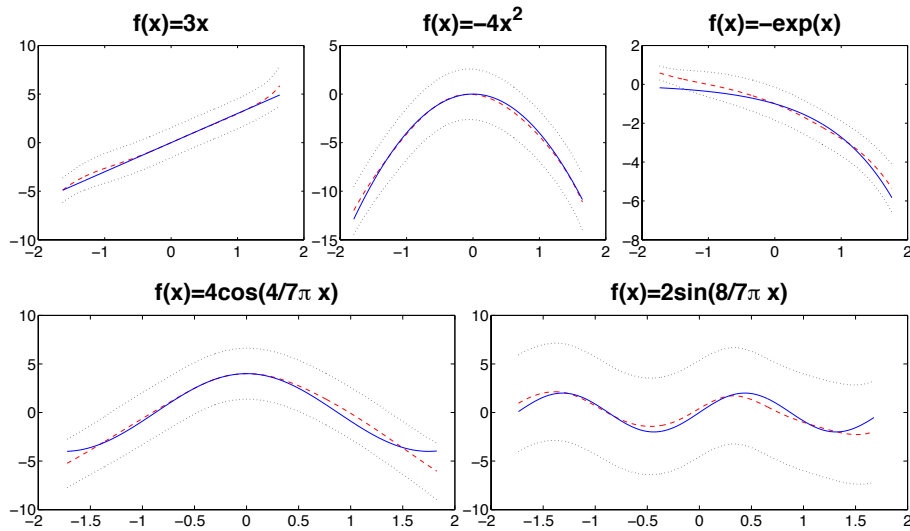

Web Figure 4: Single regression. Reconstruction of the five functions used to simulate the data. The solid lines are the true functions, the dashed lines are the estimated functions, with credible bands shown as dotted lines.



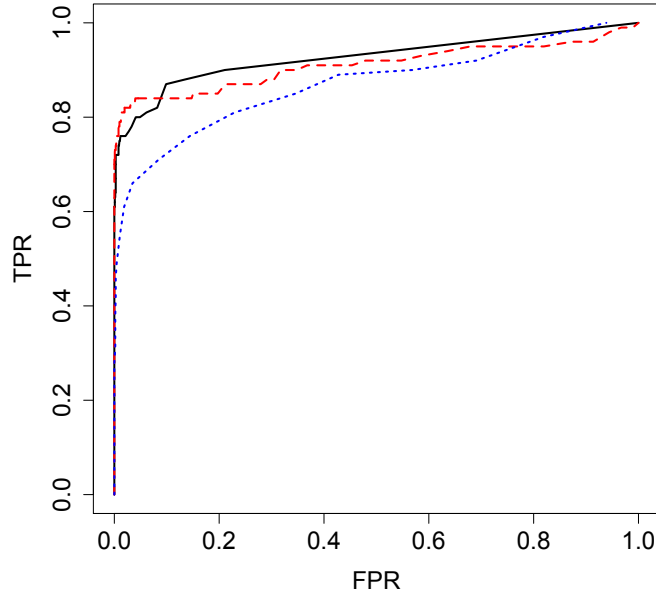

Web Figure 7: Receiver operating characteristic curves for one simulation from scenario 3. The solid curve represents nMixDAG; the dashed curve represents spikeSlabGAM; and the dotted curve represents SpAM.

Web Table 1: Single regression. Operating characteristics for SSVS, nDAG, nMixDAG, spikeSlabGAM and SpAM are calculated under different sample sizes and error variances. The bold numbers indicate the best performance. The standard error for each statistic is given in the parentheses.

| Scenario                     |      | SSVS          | nDAG                | nMixDAG             | spikeSlabGAM         | SpAM                |
|------------------------------|------|---------------|---------------------|---------------------|----------------------|---------------------|
| $n = 250$<br>$\sigma^2 = 4$  | TPR  | 0.452(0.097)  | 0.988(0.048)        | <b>1.000(0.000)</b> | <b>1.000(0.000)</b>  | <b>1.000(0.000)</b> |
|                              | FDR  | 0.073(0.133)  | <b>0.000(0.000)</b> | <b>0.000(0.000)</b> | 0.133(0.135)         | 0.735(0.096)        |
|                              | FNR  | 0.548(0.097)  | 0.012(0.048)        | <b>0.000(0.000)</b> | <b>0.000(0.000)</b>  | <b>0.000(0.000)</b> |
|                              | MSPE | 27.533(5.263) | 6.089(2.312)        | 5.800(2.667)        | <b>4.691(0.904)</b>  | 6.860(1.592)        |
| $n = 250$<br>$\sigma^2 = 16$ | TPR  | 0.412(0.110)  | 0.800(0.057)        | 0.804(0.086)        | 0.980(0.061)         | <b>1.000(0.000)</b> |
|                              | FDR  | 0.077(0.159)  | <b>0.000(0.000)</b> | <b>0.000(0.000)</b> | 0.279(0.162)         | 0.733(0.090)        |
|                              | FNR  | 0.588(0.110)  | 0.200(0.057)        | 0.196(0.086)        | 0.020(0.061)         | <b>0.000(0.000)</b> |
|                              | MSPE | 39.278(6.952) | 20.090(3.875)       | 19.882(3.805)       | <b>18.833(3.446)</b> | 23.193(4.824)       |
| $n = 200$<br>$\sigma^2 = 16$ | TPR  | 0.352(0.095)  | 0.740(0.093)        | 0.732(0.096)        | 0.940(0.093)         | <b>0.980(0.061)</b> |
|                              | FDR  | 0.128(0.187)  | <b>0.000(0.000)</b> | <b>0.000(0.000)</b> | 0.271(0.198)         | 0.692(0.112)        |
|                              | FNR  | 0.648(0.095)  | 0.260(0.093)        | 0.268(0.096)        | 0.060(0.093)         | <b>0.020(0.061)</b> |
|                              | MSPE | 40.952(7.829) | 21.320(4.566)       | 21.161(4.522)       | <b>19.994(3.855)</b> | 26.079(5.464)       |
| $n = 150$<br>$\sigma^2 = 16$ | TPR  | 0.292(0.101)  | 0.644(0.123)        | 0.652(0.113)        | 0.880(0.114)         | <b>0.912(0.108)</b> |
|                              | FDR  | 0.142(0.226)  | <b>0.000(0.000)</b> | <b>0.000(0.000)</b> | 0.366(0.166)         | 0.681(0.097)        |
|                              | FNR  | 0.708(0.101)  | 0.356(0.123)        | 0.348(0.113)        | 0.120(0.886)         | <b>0.088(0.108)</b> |
|                              | MSPE | 41.446(8.593) | 24.057(9.382)       | 23.152(8.470)       | <b>20.977(3.682)</b> | 26.939(4.916)       |

Web Table 2: Simulated networks. The average operating characteristics for nMixDAG with dimension  $G = 50, 100, 150, 200$ . The standard error for each statistic is given in the parentheses.

| Dimension | AUC5%        | AUC          | Methods      |              |               |              |
|-----------|--------------|--------------|--------------|--------------|---------------|--------------|
|           |              |              | TPR          | TPR_linear   | TPR_nonlinear | FDR          |
| 50        | 0.718(0.036) | 0.879(0.019) | 0.618(0.027) | 0.730(0.029) | 0.514(0.040)  | 0.023(0.021) |
| 100       | 0.721(0.025) | 0.867(0.012) | 0.591(0.023) | 0.670(0.031) | 0.518(0.037)  | 0.005(0.008) |
| 150       | 0.697(0.022) | 0.854(0.011) | 0.586(0.023) | 0.686(0.039) | 0.493(0.033)  | 0.001(0.003) |
| 200       | 0.669(0.024) | 0.840(0.012) | 0.582(0.019) | 0.715(0.023) | 0.459(0.033)  | 0.004(0.009) |

Web Table 3: Simulated networks. Sensitivity analysis on the hyper-prior of the parameter  $\rho$ . Three different values of parameters  $(a_\rho, b_\rho)$  are tested.

| Prior         | $(a_\rho, b_\rho) = (2, 2)$ | $(a_\rho, b_\rho) = (0.5, 0.5)$ | $(a_\rho, b_\rho) = (2, 3)$ | $(a_\rho, b_\rho) = (3, 2)$ |
|---------------|-----------------------------|---------------------------------|-----------------------------|-----------------------------|
| AUC5%         | 0.718(0.036)                | 0.703(0.033)                    | 0.715(0.039)                | 0.721(0.032)                |
| AUC           | 0.879(0.019)                | 0.870(0.017)                    | 0.878(0.019)                | 0.881(0.019)                |
| TPR           | 0.618(0.027)                | 0.610(0.028)                    | 0.618(0.028)                | 0.625(0.027)                |
| TPR_linear    | 0.730(0.029)                | 0.725(0.029)                    | 0.728(0.034)                | 0.743(0.029)                |
| TPR_nonlinear | 0.514(0.040)                | 0.503(0.043)                    | 0.516(0.040)                | 0.517(0.039)                |
| FDR           | 0.023(0.021)                | 0.034(0.029)                    | 0.038(0.026)                | 0.036(0.026)                |

Web Table 4: Simulated networks. Sensitivity analysis of the hyper-prior on the smoothing parameter  $\tau$ . Four different sets of parameters  $(a_\tau, b_\tau)$  and  $(k_\tau, \theta_\tau)$  are tested.

| Prior         | $(a_\tau, b_\tau) = (1.5, 400)$  | $(a_\tau, b_\tau) = (3, 600)$    | $(a_\tau, b_\tau) = (2, 500)$    | $(a_\tau, b_\tau) = (1.5, 300)$  | $(a_\tau, b_\tau) = (1.5, 400)$  |
|---------------|----------------------------------|----------------------------------|----------------------------------|----------------------------------|----------------------------------|
|               | $(k_\tau, \theta_\tau) = (3, 2)$ | $(k_\tau, \theta_\tau) = (3, 5)$ | $(k_\tau, \theta_\tau) = (3, 4)$ | $(k_\tau, \theta_\tau) = (1, 5)$ | $(k_\tau, \theta_\tau) = (3, 1)$ |
| AUC5%         | 0.718(0.036)                     | 0.718(0.034)                     | 0.720(0.034)                     | 0.709(0.036)                     | 0.701(0.033)                     |
| AUC           | 0.879(0.019)                     | 0.878(0.019)                     | 0.881(0.019)                     | 0.875(0.018)                     | 0.870(0.018)                     |
| TPR           | 0.618(0.027)                     | 0.620(0.027)                     | 0.623(0.030)                     | 0.619(0.028)                     | 0.611(0.029)                     |
| TPR_linear    | 0.730(0.029)                     | 0.735(0.030)                     | 0.740(0.033)                     | 0.736(0.033)                     | 0.731(0.033)                     |
| TPR_nonlinear | 0.514(0.040)                     | 0.514(0.042)                     | 0.515(0.044)                     | 0.510(0.041)                     | 0.500(0.042)                     |
| FDR           | 0.023(0.021)                     | 0.034(0.024)                     | 0.031(0.024)                     | 0.038(0.027)                     | 0.039(0.025)                     |

Web Table 5: GBM data analysis. The top 30 of 91 Nonlinear regulations (from column Source to column Target) identified by nMixDAG. They are ordered by the nonlinearity measure defined as the posterior probability  $p(\phi = 1|\mathbf{Y})$ , which is shown in the last column.

| Target   | Source   | Nonlinearity |
|----------|----------|--------------|
| ITGB7    | IL7R     | 0.9987       |
| GNB1     | JAK1     | 0.9980       |
| IL2RG    | IL2RB    | 0.9976       |
| PPP2R5E  | PPP2R5C  | 0.9944       |
| CDK4     | MDM2     | 0.9930       |
| MAPK1    | PPP2R3A  | 0.9926       |
| TLR2     | CSF1R    | 0.9898       |
| MAP2K2   | PKN1     | 0.9875       |
| IL2RB    | SYK      | 0.9861       |
| GYS2     | PRLR     | 0.9860       |
| KRAS     | PTK2     | 0.9825       |
| RAF1     | PTK2     | 0.9776       |
| G6PC3    | FOXO3    | 0.9724       |
| PCK1     | PTEN     | 0.9714       |
| YWHAH    | YWHAZ    | 0.9669       |
| CASP9    | ITGA3    | 0.9657       |
| SGK3     | PTK2     | 0.9652       |
| HSP90B1  | PDPK1    | 0.9623       |
| YWHAB    | RAC1     | 0.9622       |
| CSF3R    | SYK      | 0.9591       |
| PIK3R2   | PIK3R1   | 0.9500       |
| PPP2CB   | RAC1     | 0.9489       |
| PPP2R5C  | HSP90AA1 | 0.9392       |
| FOXO3    | JAK1     | 0.9303       |
| RPS6KB2  | JAK1     | 0.9222       |
| SGK3     | IFNAR1   | 0.9164       |
| HSP90AA1 | RAC1     | 0.9163       |
| ITGA8    | FLT1     | 0.9101       |
| CHUK     | EIF4E    | 0.9073       |
| MAP2K1   | RPS6     | 0.9063       |



Web Table 6: GBM data analysis. The middle 30 of 91 Nonlinear regulations (from column Source to column Target) identified by nMixDAG. They are ordered by the nonlinearity measure defined as the posterior probability  $p(\phi = 1|\mathbf{Y})$ , which is shown in the last column.

| Target  | Source   | Nonlinearity |
|---------|----------|--------------|
| PIK3CB  | GNGT1    | 0.8784       |
| IL2RA   | CSF1R    | 0.8742       |
| ITGB6   | PRLR     | 0.8728       |
| CCNE2   | PKN1     | 0.8726       |
| PPP2R3C | NRAS     | 0.8716       |
| YWHAZ   | PPP2CA   | 0.8598       |
| GNB2    | GNB1     | 0.8593       |
| SYK     | CSF1R    | 0.8592       |
| FASLG   | GYS2     | 0.8448       |
| MAPK1   | YWHAH    | 0.8410       |
| PPP2CB  | SYK      | 0.8395       |
| SYK     | TLR2     | 0.8267       |
| EIF4E2  | EIF4E    | 0.8001       |
| PPP2R5D | HSP90AB1 | 0.7987       |
| CREB3L2 | GSK3B    | 0.7985       |
| EIF4B   | INSR     | 0.7961       |
| MAPK3   | EIF4B    | 0.7923       |
| MYB     | CCNE2    | 0.7686       |
| EIF4E2  | EIF4EBP1 | 0.7576       |
| JAK1    | INSR     | 0.7507       |
| PPP2R1A | HSP90AB1 | 0.7466       |
| BRCA1   | RPS6KB1  | 0.7463       |
| PKN1    | AKT1     | 0.7462       |
| CDC37   | HSP90AB1 | 0.7434       |
| CREB1   | HSP90AB1 | 0.7415       |
| PIK3CG  | SYK      | 0.7351       |
| PDPK1   | IGF1R    | 0.7337       |
| IL4R    | PDGFRB   | 0.7302       |
| PPP2CA  | HSP90AB1 | 0.7232       |
| ITGA5   | KIT      | 0.7111       |

Web Table 7: GBM data analysis. The last 31 of 91 Nonlinear regulations (from column Source to column Target) identified by nMixDAG. They are ordered by the nonlinearity measure defined as the posterior probability  $p(\phi = 1|\mathbf{Y})$ , which is shown in the last column.

| Target   | Source  | Nonlinearity |
|----------|---------|--------------|
| PRKACA   | AKT1    | 0.6960       |
| GNB5     | IL4R    | 0.6911       |
| MAP2K2   | PPP2R1A | 0.6859       |
| CCNE2    | GNG4    | 0.6813       |
| MCL1     | RPS6KB1 | 0.6636       |
| MAP2K1   | YWHAH   | 0.6598       |
| CCNE1    | CDK2    | 0.6477       |
| IKBKB    | PTK2    | 0.6465       |
| GSK3B    | PDPK1   | 0.6320       |
| PIK3R3   | EDG4    | 0.6167       |
| BCL2L11  | CASP9   | 0.6111       |
| CCNE2    | CDK2    | 0.6105       |
| PPP2R2B  | IL4R    | 0.5877       |
| RBL2     | PDPK1   | 0.5800       |
| CASP9    | MAPK3   | 0.5749       |
| PPP2R2A  | PTK2    | 0.5692       |
| IL4R     | CSF1R   | 0.5689       |
| EIF4E    | NRAS    | 0.5682       |
| PIK3CG   | P2RY5   | 0.5672       |
| EIF4EBP1 | NRAS    | 0.5592       |
| HRAS     | GNB2    | 0.5589       |
| HSP90AB1 | GNB1    | 0.5584       |
| PPP2R5C  | PPP2R3C | 0.5549       |
| GSK3B    | RAF1    | 0.5486       |
| GNG4     | GNB5    | 0.5460       |
| PPP2R5B  | BCR     | 0.5400       |
| PDPK1    | RAC1    | 0.5317       |
| HSP90AB1 | PIK3CA  | 0.5293       |
| HSP90AA1 | SOS2    | 0.5287       |
| IL4R     | TLR2    | 0.5262       |
| BCL2L11  | GNG13   | 0.5152       |

## References

- Andersson, S. A., Madigan, D., and Perlman, M. D. (1997). A characterization of markov equivalence classes for acyclic digraphs. *The Annals of Statistics* **25**, 505–541.
- Barbieri, M. M. and Berger, J. O. (2004). Optimal predictive model selection. *The Annals of Statistics* **32**, 870–897.
- Cerami, E., Demir, E., Schultz, N., Taylor, B. S., and Sander, C. (2010). Automated network analysis identifies core pathways in glioblastoma. *PLoS ONE* **5**, e8918.
- Chickering, D. M. (2002). Learning equivalence classes of bayesian network structures. *The Journal of Machine Learning Research* **2**, 445–498.
- Geiger, D. and Heckerman, D. (2002). Parameter priors for directed acyclic graphical models and the characterization of several probability distributions. *The Annals of Statistics* **30**, 1412–1440.
- George, E. I. and McCulloch, R. E. (1993). Variable selection via Gibbs sampling. *Journal of the American Statistical Association* **88**, 881–889.
- Hoeting, J. A., Madigan, D., Raftery, A. E., and Volinsky, C. T. (1999). Bayesian model averaging: a tutorial. *Statistical science* pages 382–401.
- Morrissey, E. R., Juarez, M. A., Denby, K. J., and Burroughs, N. J. (2011). Inferring the time-invariant topology of a nonlinear sparse gene regulatory network using fully Bayesian spline autoregression. *Biostatistics* **12**, 682–694.
- Raftery, A. E., Madigan, D., and Hoeting, J. A. (1997). Bayesian model averaging for linear regression models. *Journal of the American Statistical Association* **92**, 179–191.
- TCGA (2008). Comprehensive genomic characterization defines human glioblastoma genes and core pathways. *Nature* **455**, 1061–1068.

Yan, J., Roy, S., Apolloni, A., Lane, A., and Hancock, J. F. (1998). Ras isoforms vary in their ability to activate raf-1 and phosphoinositide 3-kinase. *Journal of Biological Chemistry* **273**, 24052–24056.
